# Supplementary material for: Heterocyclic-2-thione derivatives of metals incorporating cyclopalladated azobenzenes of variable nuclearity and N,S-bridged 1D polymer of [bis(pyridine-2-thiolato)mercury(ii)]
Source: Royal Society of Chemistry journal article supplement (doi:10.1039/d1nj05564j), 2022-01-01
Supplement: d1nj05564j1.pdf [file d1nj05564j1.pdf]

Electronic supporting information (ESI)

## Heterocyclic-2-thione derivatives of metals incorporating cyclopalladated azobenzenes of variable nuclearity and N, S- bridged 1D polymer of [bis(pyridine-2-thiolato)mercury(II)]

Tarlok S. Lobana<sup>1\*</sup>, Amanpreet K. Sandhu<sup>1</sup>, Geeta Hundal<sup>1</sup>, Jerry P. Jasinski<sup>2 $\Psi$</sup>

<sup>1</sup>Department of Chemistry, Guru Nanak Dev University, Amritsar – 143 005, India

<sup>2</sup> Department of Chemistry, Keene State College, Keene NH 03435-2001 USA

\*Corresponding author email : tarlokslobana@yahoo.co.in

$\Psi$  Deceased (dated April 13, 2021)

1S. X-ray structures

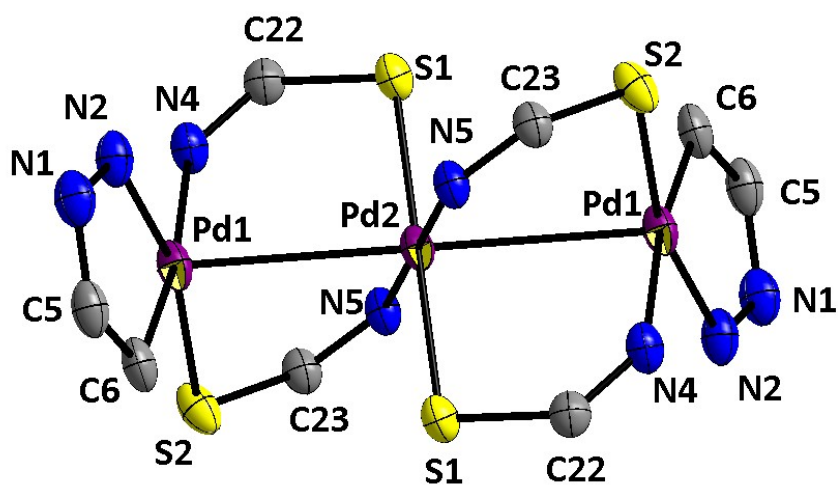

Fig.S1. Structure of trinuclear cluster 4.

2S.UV-visible spectra (Fig. S2, S3 and S4)

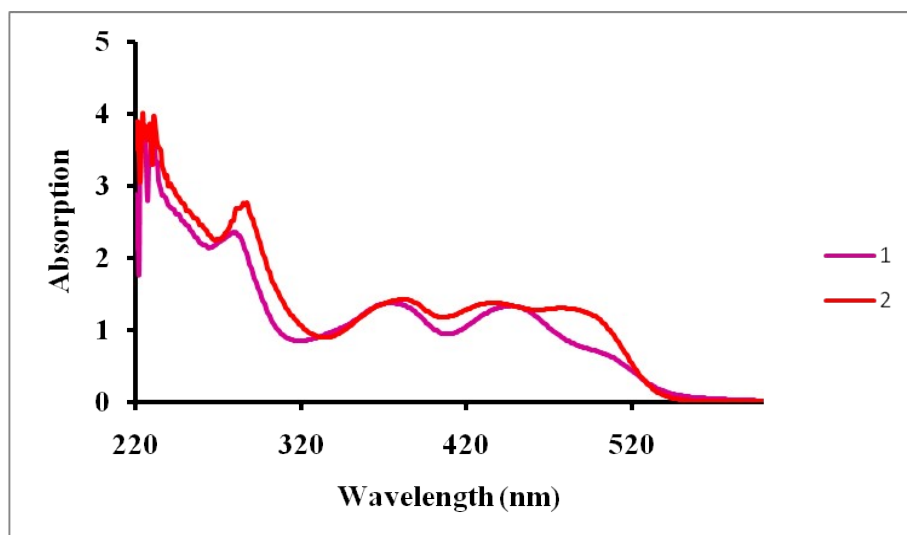

**Fig. S2.** UV-visible absorption spectra of **1** and **2** in  $10^{-4}$  M solution in  $\text{CH}_2\text{Cl}_2$  solvent

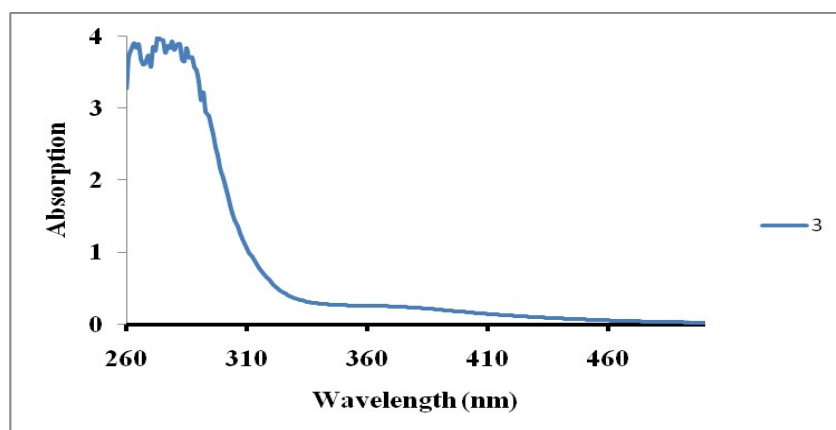

**Fig. S3.** UV-visible absorption spectrum of **3** in  $10^{-5}$  M solution in DMSO solvent

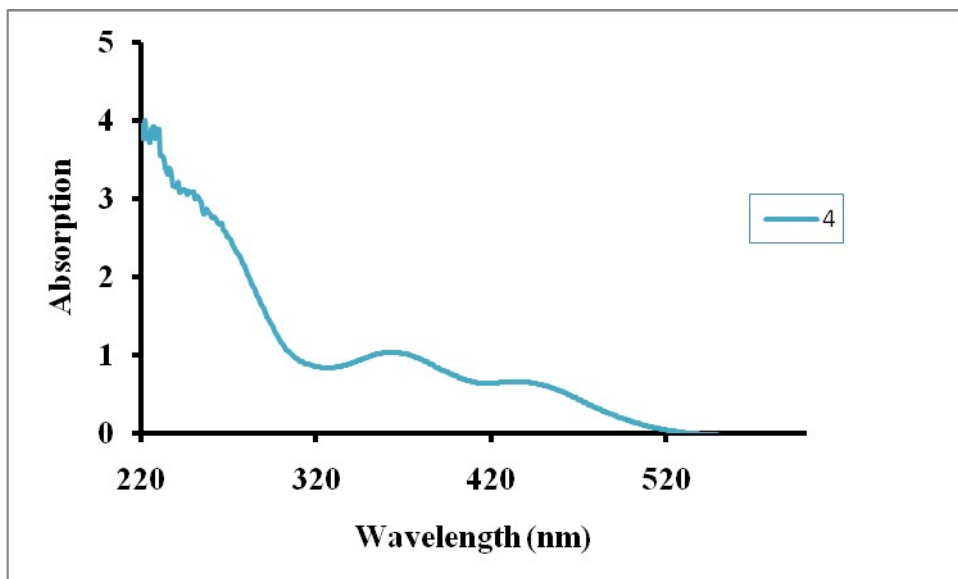

Fig. S4. Electronic absorption spectrum of complex 4

## 2S. NMR spectra

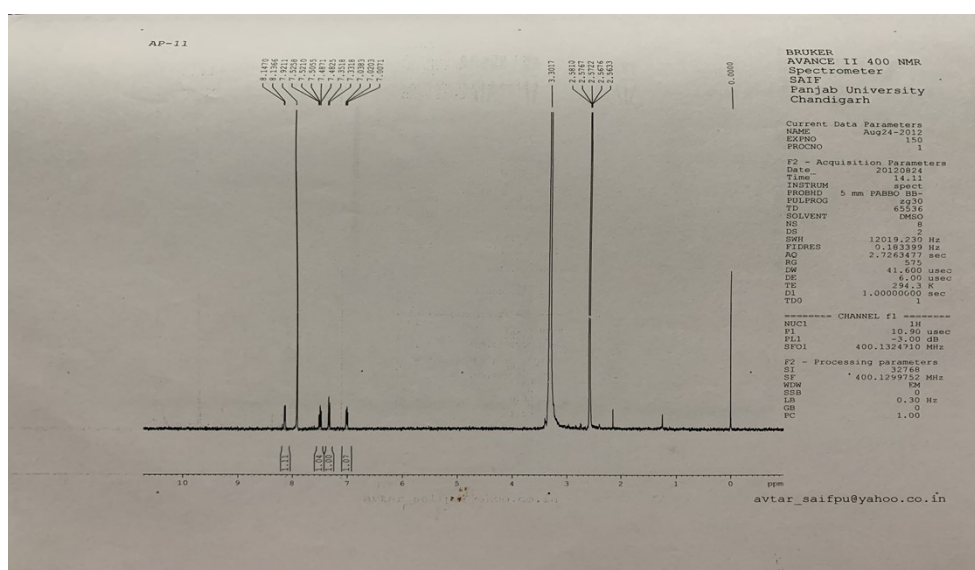

Fig. S5. Proton NMR of Hg complex 5

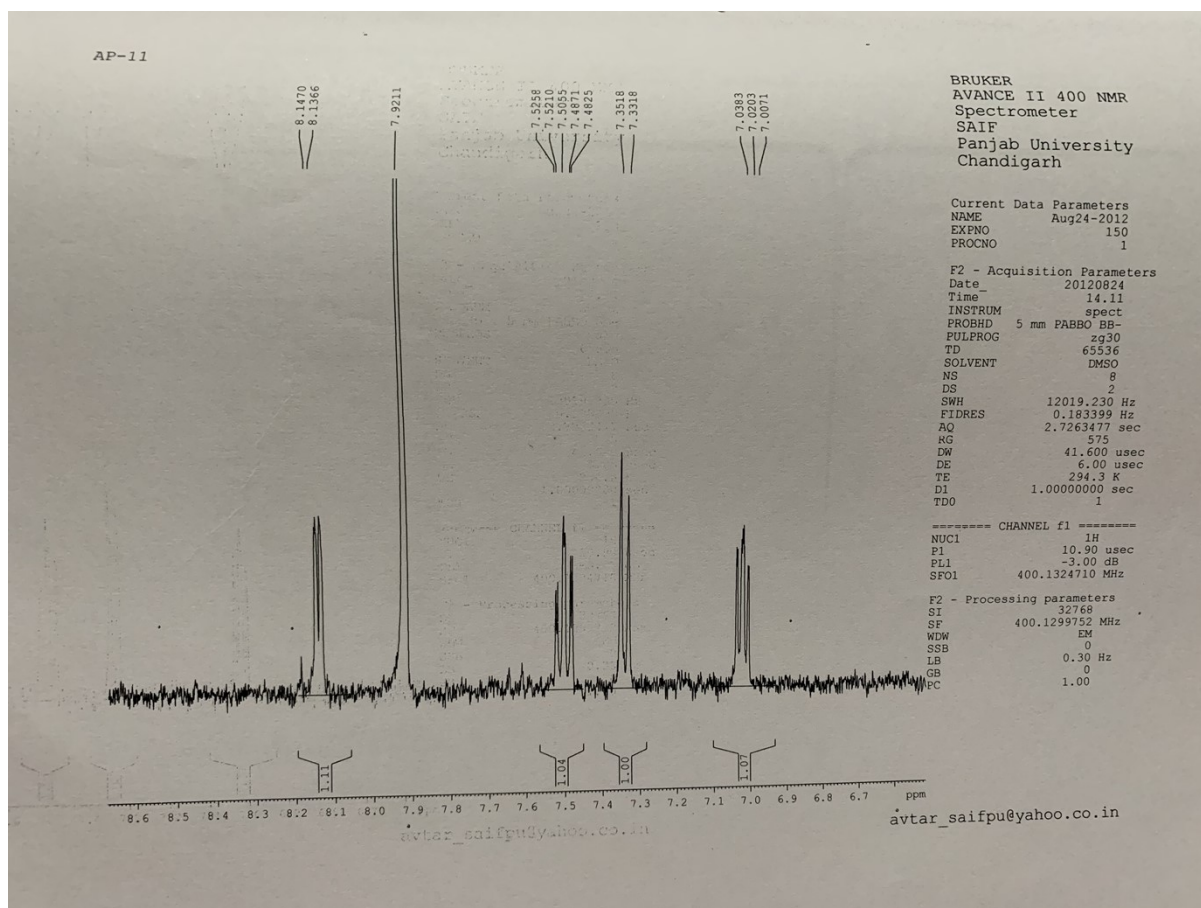

Fig. S6. Expanded Proton NMR spectrum of Hg complex 5

### 3S. Bond parameters

**Table S1.** Selected bond distances (Å) and angles (°) of compounds (1-5)

| Compound 1 |           |           |           |           |          |
|------------|-----------|-----------|-----------|-----------|----------|
| Pd1-S1     | 2.294(2)  | Pd1-N1    | 2.093(5)  | Pd1-N3    | 2.157(6) |
| Pd1-C2     | 1.975(7)  | Pd1-Pd1   | 2.876(1)  | S1- C21   | 1.741(7) |
| N1-N2      | 1.277(8)  | C4-O1     | 1.374(9)  | C12-O2    | 1.376(8) |
| N1-Pd1-S1  | 170.1(2)  | C2-Pd1-N3 | 177.8(2)  | N3-Pd1-S1 | 89.8(2)  |
| C2-Pd1-S1  | 91.4(2)   | C2-Pd1-N1 | 79.0(2)   | N1-Pd1-N3 | 99.8(2)  |
| Compound 2 |           |           |           |           |          |
| Pd1-S1     | 2.2920(7) | Pd1-N1    | 2.082(2)  | S1- C19   | 1.735(3) |
| Pd1-C7     | 1.970(3)  | Pd1-Pd1   | 2.8527(4) | N1-N2     | 1.280(3) |
| Pd1-N3     | 2.154(2)  | O1-C4     | 1.366(3)  |           |          |
| N1-Pd1-S1  | 170.05(6) | C7-Pd1-N3 | 177.2(1)  | C7-Pd1-S1 | 91.84(8) |

|                         |            |             |           |            |            |
|-------------------------|------------|-------------|-----------|------------|------------|
| N3-Pd1-S1               | 89.78(6)   | N1-Pd1-N3   | 99.77(9)  | C7-Pd1-N1  | 78.74(10)  |
| <b>Compound 3</b>       |            |             |           |            |            |
| Pd1-S1                  | 2.3012(7)  | Pd1-C11     | 2.3977(7) | Pd1-C1     | 1.994(2)   |
| Pd1-N2                  | 2.062(2)   | C13-S1      | 1.717(3)  | N1-N2      | 1.269(3)   |
| N2-Pd1-S1               | 165.43(6)  | C11-Pd1-C1  | 170.46(9) | C11-Pd1-S1 | 101.45(3)  |
| C11-Pd1-N2              | 92.93(6)   | N2-Pd1-C1   | 78.80(10) | C1-Pd1-S1  | 86.67(8)   |
| <b>Compound 4</b>       |            |             |           |            |            |
| Pd1-C6                  | 1.973(3)   | Pd1-S2      | 2.298(1)  | Pd1-N2     | 2.061(3)   |
| Pd1-N2                  | 2.061(3)   | Pd2 – Pd1   | 3.0432(7) | Pd2-S1     | 2.3296(11) |
| Pd2-N5                  | 2.023(2)   | N1-N2       | 1.273(4)  | C1-O1      | 1.439(9)   |
| C22-S1                  | 1.723(3)   | C23-S2      | 1.722(3)  |            |            |
| S2-Pd1-N4               | 94.27(8)   | S2-Pd1-C6   | 91.22(11) | C6-Pd1-N4  | 171.19(12) |
| N2-Pd1-N4               | 94.12(11)  | N2-Pd1-C6   | 79.5(14)  | N2-Pd1-S2  | 164.67(84) |
| N5-Pd2-N5*              | 180.0      | S1-Pd2-S1*  | 180.0     | N5-Pd2-S1  | 88.18(8)   |
| N5-Pd2-S1*              | 91.82(8)   | N5*-Pd2-S1* | 88.18(8)  | N5*-Pd2-S1 | 91.82(8)   |
| <b>Compound 5</b>       |            |             |           |            |            |
| Hg1-S1,S*               | 2.3533(19) | S1-C1       | 1.927(5)  | S1-Hg1-S1* | 111.4(1)   |
| Hg1-S1-C1               | 106.39(15) | S1-C1-C2    | 94.1(3)   | S1-C1-N1   | 128.8(3)   |
| All pyridyl ring angles | 120.0      |             |           |            |            |

\* -x,y,-z
